# Supplementary material for: The influence of distance and quality of care on place of delivery in rural Ghana
Source: PubMed Central journal article supplement (PMC4978958; doi:10.1038/srep30291), 2016-08-10
Supplement: srep30291-s1.pdf [file srep30291-s1.pdf]

**Title:** The influence of distance and quality of care on place of delivery in rural Ghana

**Authors:** Robin C. Nesbitt, Terhi J. Lohela, Seyi Soremekun, Linda Vesel, Alexander Manu, Eunice Okyere, Chris Grundy, Seeba Amenga-Etego, Seth Owusu-Agyei, Betty R. Kirkwood, Sabine Gabrysch

**Author Affiliations:**

**Robin C Nesbitt**, MSc DrScHum \*

Epidemiology and Biostatistics Unit, Institute of Public Health, Heidelberg University, Heidelberg, Germany

\*Corresponding author. Email: [robin.nesbitt@uni-heidelberg.de](mailto:robin.nesbitt@uni-heidelberg.de)

**Terhi J Lohela**, MD MScIH

Department of Public Health, University of Helsinki, Helsinki, Finland

Email: [terhi.lohela@helsinki.fi](mailto:terhi.lohela@helsinki.fi)

**Seyi Soremekun**, MSc PhD

Maternal & Child Health Intervention Research Group, Faculty of Epidemiology and Population Health, London School of Hygiene and Tropical Medicine, London, UK

Email: [seyi.soremekun@lshtm.ac.uk](mailto:seyi.soremekun@lshtm.ac.uk)

**Linda Vesel**, MPH PhD

Innovations for Maternal, Newborn and Child Health Initiative, Concern Worldwide US, New York, USA

Email: [linda.vesel@gmail.com](mailto:linda.vesel@gmail.com)

**Alexander Manu**, MBChB MSc PhD

Kintampo Health Research Center, Ghana Health Service, Kintampo, Ghana; Maternal & Child Health Intervention Research Group, Faculty of Epidemiology and Population Health, London School of Hygiene and Tropical Medicine, London, UK

Email: [makmanu128@gmail.com](mailto:makmanu128@gmail.com)

**Eunice Okyere, MScIH**

Flinders University, Department of Public Health, Adelaide, South Australia.

Email: [euniceadoma@yahoo.co.uk](mailto:euniceadoma@yahoo.co.uk)

**Chris Grundy, MSc**

Department of Infectious Disease Epidemiology, Faculty of Epidemiology and Population Health, London

School of Hygiene and Tropical Medicine, London, UK

Email: [chris.grundy@lshtm.ac.uk](mailto:chris.grundy@lshtm.ac.uk)

**Seeba Amenga-Etego, MSc**

Kintampo Health Research Center, Ghana Health Service, Kintampo, Ghana

Email: [seeba.ae@kintampo-hrc.org](mailto:seeba.ae@kintampo-hrc.org)

**Seth Owusu-Agyei, PhD**

Director, Kintampo Health Research Center, Ghana Health Service, Kintampo, Ghana

Email: [seth.owusu-agyei@kintampo-hrc.org](mailto:seth.owusu-agyei@kintampo-hrc.org)

**Betty R Kirkwood, MA MSc DIC FFPH FMedSci**

Maternal & Child Health Intervention Research Group, Faculty of Epidemiology and Population Health,

London School of Hygiene and Tropical Medicine, London, UK

Email: [Betty.Kirkwood@lshtm.ac.uk](mailto:Betty.Kirkwood@lshtm.ac.uk)

**Sabine Gabrysch, MD PhD**

Unit of Epidemiology and Biostatistics, Institute of Public Health, Heidelberg University, Heidelberg,  
Germany.

Email: [sabine.gabrysch@uni-heidelberg.de](mailto:sabine.gabrysch@uni-heidelberg.de)

## Supplementary tables and figures

**Supplementary table 1.** Association between facility delivery and quality of care using alternative quality measures, n=11,274.

|                                                                                                           | Deliveries<br>n (%) |      | Facility delivery<br>n (%) <sup>2</sup> |      | Crude OR (95% CI), p-value <sup>3</sup><br>n= 11,274 |           |        | Adjusted <sup>4</sup> OR (95% CI), p-<br>value <sup>3</sup> n= 11,129 |           |        |
|-----------------------------------------------------------------------------------------------------------|---------------------|------|-----------------------------------------|------|------------------------------------------------------|-----------|--------|-----------------------------------------------------------------------|-----------|--------|
| <b>Distance to closest delivery facility and vignette score<sup>5</sup> of the closest facility</b>       |                     |      |                                         |      |                                                      |           |        |                                                                       |           |        |
| Sqrt distance <sup>1</sup>                                                                                |                     |      |                                         |      | 0.47                                                 | 0.42-0.53 | <0.001 | 0.56                                                                  | 0.50-0.63 | <0.001 |
| Low (<50%)                                                                                                | 2485                | 22.0 | 1287                                    | 51.8 | 1.0                                                  |           |        | 1.0                                                                   |           |        |
| Moderate<br>(50-75%)                                                                                      | 8789                | 78.0 | 5236                                    | 59.6 | 1.02                                                 | 0.99-1.05 | 0.14   | 1.01                                                                  | 0.98-1.04 | 0.49   |
| High (>75%)                                                                                               | 0                   | 0    |                                         |      |                                                      |           |        |                                                                       |           |        |
| <b>Distance to closest delivery facility and simple quality score<sup>6</sup> of the closest facility</b> |                     |      |                                         |      |                                                      |           |        |                                                                       |           |        |
| Sqrt distance <sup>1</sup>                                                                                |                     |      |                                         |      | 0.46                                                 | 0.41-0.51 | <0.001 | 0.55                                                                  | 0.49-62   | <0.001 |
| Low (<50%)                                                                                                | 2982                | 26.5 | 1561                                    | 52.4 | 1.0                                                  |           |        | 1.0                                                                   |           |        |
| Moderate<br>(50-75%)                                                                                      | 7400                | 92.1 | 4425                                    | 59.8 | 1.38                                                 | 1.07-1.79 | 0.014  | 1.19                                                                  | 0.92-1.54 | 0.19   |
| High (>75%)                                                                                               | 892                 | 7.9  | 537                                     | 60.2 | 1.77                                                 | 1.22-2.57 | 0.003  | 1.38                                                                  | 0.94-2.01 | 0.10   |

**Notes:**

<sup>1</sup>Straight-line distance was square root transformed, e.g., 4km -->  $\sqrt{4} = 2$ , 9km -->  $\sqrt{9} = 3$ . ORs for facility delivery reflect the change per one unit of the transformed variable, i.e. from 1km to 4km to 9km, etc.

<sup>2</sup>Chi square tests for % facility delivery across categories, both variables:  $p < 0.001$

<sup>3</sup>Wald test p-values for each level of categorical variables

<sup>4</sup>Covariates in adjusted models include: age, parity, previous stillbirth, multiple birth, marital status, wealth quintile, education, occupation, religion, ethnicity, health insurance and Newhints intervention zone.

<sup>5</sup>For details on the vignette score, please see reference 24.

<sup>6</sup>The simple quality score was calculated using one point per signal function, one point per health professional (up to 3), one point per doctor conducting cesarean section (up to 3), to a maximum total of 32 points.

**Supplementary table 2.** Association between facility delivery and distance to delivery care of a certain quality, n=11,274.

|                                                                              | Deliveries<br>n (%) |      | Facility delivery<br>n (%) <sup>1</sup> |      | Crude OR (95% CI), p-value <sup>2</sup><br>n= 11,274 |           |        | Adjusted OR <sup>3</sup> (95% CI), p-value <sup>2</sup><br>n= 11,129 |           |      |
|------------------------------------------------------------------------------|---------------------|------|-----------------------------------------|------|------------------------------------------------------|-----------|--------|----------------------------------------------------------------------|-----------|------|
| <b>Distance to closest EmOC facility (BEmOC or CEmOC)</b>                    |                     |      |                                         |      |                                                      |           |        |                                                                      |           |      |
| < 10 km                                                                      | 3420                | 30.3 | 2198                                    | 64.3 | 1.0                                                  |           |        | 1.0                                                                  |           |      |
| 10 - 20 km                                                                   | 4657                | 41.3 | 2588                                    | 55.6 | 0.70                                                 | 0.51-0.98 | 0.04   | 0.85                                                                 | 0.63-1.15 | 0.29 |
| 20 - 30 km                                                                   | 1915                | 17.0 | 1199                                    | 62.6 | 0.76                                                 | 0.50-1.14 | 0.18   | 1.12                                                                 | 0.77-1.62 | 0.57 |
| > 30 km                                                                      | 1282                | 11.4 | 538                                     | 42.0 | 0.62                                                 | 0.37-1.04 | 0.07   | 0.87                                                                 | 0.54-1.39 | 0.56 |
| <b>Distance to closest CEmOC facility</b>                                    |                     |      |                                         |      |                                                      |           |        |                                                                      |           |      |
| < 10 km                                                                      | 2667                | 23.7 | 1795                                    | 67.3 | 1.0                                                  |           |        | 1.0                                                                  |           |      |
| 10 - 20 km                                                                   | 4388                | 38.9 | 2483                                    | 56.6 | 0.72                                                 | 0.51-1.03 | 0.07   | 0.87                                                                 | 0.63-1.20 | 0.39 |
| 20 - 30 km                                                                   | 2937                | 26.1 | 1707                                    | 58.1 | 0.67                                                 | 0.46-0.98 | 0.04   | 0.97                                                                 | 0.68-1.38 | 0.85 |
| > 30 km                                                                      | 1282                | 11.4 | 538                                     | 42.0 | 0.59                                                 | 0.35-1.01 | 0.05   | 0.86                                                                 | 0.53-1.39 | 0.53 |
| <b>Distance to closest facility with good routine care (High or Highest)</b> |                     |      |                                         |      |                                                      |           |        |                                                                      |           |      |
| < 5 km                                                                       | 2743                | 24.3 | 1917                                    | 69.9 | 1.0                                                  |           |        | 1.0                                                                  |           |      |
| 5 - 10 km                                                                    | 2844                | 25.2 | 1567                                    | 55.1 | 0.60                                                 | 0.41-0.89 | 0.01   | 0.81                                                                 | 0.57-1.16 | 0.25 |
| 10 - 15 km                                                                   | 3111                | 27.6 | 1713                                    | 55.1 | 0.51                                                 | 0.34-0.77 | 0.001  | 0.80                                                                 | 0.55-1.16 | 0.24 |
| > 15 km                                                                      | 2576                | 22.9 | 1326                                    | 51.5 | 0.55                                                 | 0.37-0.83 | 0.004  | 0.92                                                                 | 0.63-1.33 | 0.65 |
| <b>Distance to closest EmNC facility (BEmNC or CEmNC)</b>                    |                     |      |                                         |      |                                                      |           |        |                                                                      |           |      |
| <15 km                                                                       | 3288                | 29.2 | 2089                                    | 63.3 | 1.0                                                  |           |        | 1.0                                                                  |           |      |
| 15 - 30 km                                                                   | 3582                | 31.8 | 2175                                    | 60.2 | 0.90                                                 | 0.64-1.25 | 0.51   | 1.10                                                                 | 0.81-1.50 | 0.55 |
| 30 - 45 km                                                                   | 2629                | 23.3 | 1693                                    | 64.4 | 1.07                                                 | 0.73-1.58 | 0.72   | 1.51                                                                 | 1.05-2.16 | 0.03 |
| > 45                                                                         | 1775                | 15.7 | 566                                     | 31.9 | 0.35                                                 | 0.23-0.52 | <0.001 | 0.60                                                                 | 0.41-0.88 | 0.01 |
| <b>Distance to closest hospital</b>                                          |                     |      |                                         |      |                                                      |           |        |                                                                      |           |      |
| < 10 km                                                                      | 3592                | 31.9 | 2361                                    | 65.7 | 1.0                                                  |           |        | 1.0                                                                  |           |      |
| 10 - 15 km                                                                   | 2940                | 26.1 | 1632                                    | 55.5 | 0.72                                                 | 0.50-1.03 | 0.08   | 0.83                                                                 | 0.59-1.15 | 0.26 |
| 15 - 25 km                                                                   | 3346                | 29.7 | 2005                                    | 59.9 | 0.73                                                 | 0.51-1.04 | 0.08   | 0.99                                                                 | 0.71-1.36 | 0.93 |
| > 25 km                                                                      | 1396                | 12.4 | 525                                     | 37.6 | 0.50                                                 | 0.32-0.79 | 0.003  | 0.74                                                                 | 0.49-1.12 | 0.16 |

**Notes:**

<sup>1</sup> Chi square tests for % facility delivery across categories, both variables: p<0.001

<sup>2</sup> Wald test p-values for each level of categorical variables

<sup>3</sup> Covariates in adjusted models include: age, parity, previous stillbirth, multiple birth, marital status, wealth quintile, education, occupation, religion, ethnicity, health insurance and Newhints intervention zone.

**Supplementary table 3.** Association between facility delivery and EmOC quality of best facility within a certain distance.

|                                                            | Deliveries<br>n (%) |      | Facility delivery<br>n (%) <sup>1</sup> |      | Crude OR (95% CI), p-value <sup>2</sup><br>n= 11,274 |            |        | Adjusted <sup>3</sup> OR (95% CI), p-value <sup>2</sup><br>n= 11,129 |           |        |
|------------------------------------------------------------|---------------------|------|-----------------------------------------|------|------------------------------------------------------|------------|--------|----------------------------------------------------------------------|-----------|--------|
| <b>EmOC quality provided at best facility within 2 km</b>  |                     |      |                                         |      |                                                      |            |        |                                                                      |           |        |
| None                                                       | 6477                | 57.5 | 2794                                    | 43.1 | 0.16                                                 | 0.084-0.30 | <0.001 | 0.25                                                                 | 0.14-0.46 | <0.001 |
| Substandard                                                | 445                 | 4.0  | 234                                     | 52.6 | 0.20                                                 | 0.079-0.52 | <0.001 | 0.37                                                                 | 0.15-0.89 | <0.001 |
| Low                                                        | 2838                | 25.2 | 2275                                    | 80.2 | 0.83                                                 | 0.42-1.66  | 0.60   | 1.03                                                                 | 0.54-1.97 | 0.93   |
| Intermediate                                               | 1244                | 11.0 | 996                                     | 80.1 | 1                                                    |            |        | 1                                                                    |           |        |
| BEmOC                                                      | 195                 | 1.7  | 156                                     | 80.0 | 0.87                                                 | 0.26-2.84  | 0.81   | 1.18                                                                 | 0.38-3.64 | 0.78   |
| CEmOC                                                      | 75                  | 0.7  | 68                                      | 90.7 | 2.10                                                 | 0.44-9.99  | 0.35   | 1.45                                                                 | 0.33-6.38 | 0.62   |
| <b>EmOC quality provided at best facility within 5 km</b>  |                     |      |                                         |      |                                                      |            |        |                                                                      |           |        |
| None                                                       | 4508                | 40.0 | 1727                                    | 38.3 | 0.30                                                 | 0.18-0.50  | <0.001 | 0.48                                                                 | 0.30-0.78 | 0.0031 |
| Substandard                                                | 454                 | 4.0  | 234                                     | 51.5 | 0.36                                                 | 0.15-0.86  | 0.021  | 0.60                                                                 | 0.26-1.41 | 0.24   |
| Low                                                        | 3862                | 34.3 | 2741                                    | 71.0 | 0.89                                                 | 0.53-1.50  | 0.67   | 1.01                                                                 | 0.61-1.68 | 0.96   |
| Intermediate                                               | 1604                | 14.2 | 1202                                    | 74.9 | 1                                                    |            |        | 1                                                                    |           |        |
| BEmOC                                                      | 285                 | 2.5  | 188                                     | 66.0 | 0.54                                                 | 0.22-1.32  | 0.18   | 0.75                                                                 | 0.31-1.78 | 0.51   |
| CEmOC                                                      | 561                 | 5.0  | 431                                     | 76.8 | 1.37                                                 | 0.70-2.68  | 0.36   | 1.22                                                                 | 0.63-2.37 | 0.55   |
| <b>EmOC quality provided at best facility within 10 km</b> |                     |      |                                         |      |                                                      |            |        |                                                                      |           |        |
| None                                                       | 1722                | 15.3 | 479                                     | 27.8 | 0.30                                                 | 0.19-0.48  | <0.001 | 0.41                                                                 | 0.26-0.63 | <0.001 |
| Substandard                                                | 285                 | 2.5  | 79                                      | 27.7 | 0.30                                                 | 0.13-0.71  | 0.0059 | 0.37                                                                 | 0.16-0.82 | 0.015  |
| Low                                                        | 4425                | 39.3 | 2821                                    | 63.8 | 0.98                                                 | 0.65-1.48  | 0.91   | 1.02                                                                 | 0.69-1.50 | 0.93   |
| Intermediate                                               | 1422                | 12.6 | 946                                     | 66.5 | 1                                                    |            |        | 1                                                                    |           |        |
| BEmOC                                                      | 753                 | 6.7  | 403                                     | 53.5 | 0.82                                                 | 0.43-1.53  | 0.53   | 0.79                                                                 | 0.44-1.42 | 0.42   |
| CEmOC                                                      | 2667                | 23.7 | 1795                                    | 67.3 | 1.04                                                 | 0.67-1.61  | 0.85   | 0.88                                                                 | 0.58-1.32 | 0.53   |

**Notes:**

<sup>1</sup> Chi square tests for % facility delivery across categories, both variables: p<0.001

<sup>2</sup> Wald test p-values for each level of categorical variables

<sup>3</sup> Covariates in adjusted models include: age, parity, previous stillbirth, multiple birth, marital status, wealth quintile, education, occupation, religion, ethnicity, health insurance and Newhints intervention zone.

**Supplementary table 4.** Association between facility delivery and EmNC quality of the best facility within a certain distance.

|                                                            | Deliveries<br>n (%) |      | Facility delivery<br>n (%) <sup>2</sup> |      | Crude OR (95% CI), p-value <sup>3</sup><br>n= 11,274 |            |        | Adjusted <sup>4</sup> OR (95% CI), p-<br>value <sup>3</sup> n= 11,129 |           |        |
|------------------------------------------------------------|---------------------|------|-----------------------------------------|------|------------------------------------------------------|------------|--------|-----------------------------------------------------------------------|-----------|--------|
| <b>EmNC quality provided at best facility within 2 km</b>  |                     |      |                                         |      |                                                      |            |        |                                                                       |           |        |
| None                                                       | 6477                | 57.5 | 2794                                    | 43.1 | 0.14                                                 | 0.088-0.24 | <0.001 | 0.21                                                                  | 0.13-0.34 | <0.001 |
| Substandard                                                | 687                 | 6.1  | 474                                     | 69.0 | 0.39                                                 | 0.18-0.87  | 0.021  | 0.59                                                                  | 0.28-1.23 | 0.16   |
| Low                                                        | 2636                | 23.4 | 2064                                    | 78.3 | 0.72                                                 | 0.40-1.28  | 0.26   | 0.79                                                                  | 0.46-1.36 | 0.40   |
| Intermediate                                               | 1387                | 12.3 | 1131                                    | 81.5 | 1                                                    |            |        | 1                                                                     |           |        |
| BEmOC                                                      | 87                  | 0.77 | 60                                      | 69.0 | 0.31                                                 | 0.10-0.96  | 0.042  | 0.37                                                                  | 0.13-1.08 | 0.069  |
| CEmOC <sup>1</sup>                                         |                     |      |                                         |      |                                                      |            |        |                                                                       |           |        |
| <b>EmNC quality provided at best facility within 5 km</b>  |                     |      |                                         |      |                                                      |            |        |                                                                       |           |        |
| None                                                       | 4508                | 40.0 | 1727                                    | 38.3 | 0.35                                                 | 0.25-0.49  | <0.001 | 0.54                                                                  | 0.39-0.76 | <0.001 |
| Substandard                                                | 700                 | 6.2  | 461                                     | 65.9 | 0.71                                                 | 0.34-1.48  | 0.37   | 1.24                                                                  | 0.62-2.50 | 0.55   |
| Low                                                        | 3370                | 29.9 | 2419                                    | 71.8 | 1.12                                                 | 0.75-1.67  | 0.57   | 1.28                                                                  | 0.87-1.87 | 0.21   |
| Intermediate                                               | 2344                | 20.8 | 1670                                    | 71.3 | 1                                                    |            |        | 1                                                                     |           |        |
| BEmOC                                                      | 352                 | 3.1  | 246                                     | 69.9 | 0.87                                                 | 0.44-1.71  | 0.69   | 0.77                                                                  | 0.40-1.49 | 0.44   |
| CEmOC                                                      |                     |      |                                         |      |                                                      |            |        |                                                                       |           |        |
| <b>EmNC quality provided at best facility within 10 km</b> |                     |      |                                         |      |                                                      |            |        |                                                                       |           |        |
| None                                                       | 1722                | 15.3 | 479                                     | 27.8 | 0.32                                                 | 0.22-0.47  | <0.001 | 0.46                                                                  | 0.32-0.65 | <0.001 |
| Substandard                                                | 600                 | 5.3  | 293                                     | 48.8 | 0.48                                                 | 0.24-0.95  | 0.035  | 0.61                                                                  | 0.32-1.16 | 0.13   |
| Low                                                        | 2965                | 26.3 | 1779                                    | 60.0 | 0.91                                                 | 0.66-1.26  | 0.58   | 1.18                                                                  | 0.86-1.61 | 0.31   |
| Intermediate                                               | 3998                | 35.5 | 2557                                    | 64.0 | 1                                                    |            |        | 1                                                                     |           |        |
| BEmOC                                                      | 1989                | 17.6 | 1415                                    | 71.1 | 1.41                                                 | 0.97-2.06  | 0.074  | 1.06                                                                  | 0.74-1.52 | 0.75   |
| CEmOC                                                      |                     |      |                                         |      |                                                      |            |        |                                                                       |           |        |

**Notes:**

<sup>1</sup>CEmOC facility row is blank because no CEmOC facilities were within 10 km of a village (closest is 20.7 km).

<sup>2</sup>Chi square tests for % facility delivery across categories, both variables: p<0.001

<sup>3</sup>Wald test p-values for each level of categorical variables

<sup>4</sup>Covariates in adjusted models include: age, parity, previous stillbirth, multiple birth, marital status, wealth quintile, education, occupation, religion, ethnicity, health insurance and Newhints intervention zone.

**Supplementary table 5.** Association between facility delivery and routine care quality of the best facility within a certain distance.

|                                                                             | Deliveries<br>n (%) |      | Facility delivery<br>n (%) <sup>1</sup> |      | Crude OR (95% CI), p-value <sup>2</sup><br>n= 11,274 |            |        | Adjusted OR (95% CI), p-value <sup>3</sup><br>n= 11,129 |           |        |
|-----------------------------------------------------------------------------|---------------------|------|-----------------------------------------|------|------------------------------------------------------|------------|--------|---------------------------------------------------------|-----------|--------|
| <b>Routine delivery care quality provided at best facility within 2 km</b>  |                     |      |                                         |      |                                                      |            |        |                                                         |           |        |
| None                                                                        | 6477                | 57.5 | 2794                                    | 43.1 | 0.14                                                 | 0.078-0.25 | <0.001 | 0.21                                                    | 0.12-0.36 | <0.001 |
| Substandard                                                                 | 304                 | 2.7  | 183                                     | 60.2 | 0.22                                                 | 0.079-0.64 | 0.0052 | 0.34                                                    | 0.13-0.91 | 0.031  |
| Low                                                                         | 1652                | 14.7 | 1203                                    | 72.8 | 0.50                                                 | 0.26-0.99  | 0.045  | 0.64                                                    | 0.34-1.20 | 0.17   |
| Intermediate                                                                | 1388                | 12.3 | 1137                                    | 81.9 | 1                                                    |            |        | 1                                                       |           |        |
| High                                                                        | 1059                | 9.4  | 873                                     | 82.4 | 0.93                                                 | 0.45-1.94  | 0.85   | 1.05                                                    | 0.53-2.10 | 0.89   |
| Highest                                                                     | 394                 | 57.5 | 333                                     | 84.5 | 1.43                                                 | 0.35-5.80  | 0.61   | 1.04                                                    | 0.29-3.81 | 0.95   |
| <b>Routine delivery care quality provided at best facility within 5 km</b>  |                     |      |                                         |      |                                                      |            |        |                                                         |           |        |
| None                                                                        | 4508                | 40.0 | 1727                                    | 38.3 | 0.17                                                 | 0.10-0.28  | <0.001 | 0.27                                                    | 0.17-0.45 | <0.001 |
| Substandard                                                                 | 313                 | 2.8  | 183                                     | 58.5 | 0.22                                                 | 0.083-0.60 | 0.0031 | 0.36                                                    | 0.14-0.93 | 0.036  |
| Low                                                                         | 2008                | 17.8 | 1346                                    | 67.0 | 0.51                                                 | 0.29-0.89  | 0.018  | 0.66                                                    | 0.39-1.14 | 0.14   |
| Intermediate                                                                | 1702                | 15.1 | 1350                                    | 79.3 | 1                                                    |            |        | 1                                                       |           |        |
| High                                                                        | 1967                | 17.5 | 1297                                    | 65.9 | 0.37                                                 | 0.21-0.64  | <0.001 | 0.39                                                    | 0.23-0.67 | <0.001 |
| Highest                                                                     | 776                 | 6.9  | 620                                     | 79.9 | 0.88                                                 | 0.43-1.82  | 0.73   | 0.71                                                    | 0.35-1.44 | 0.34   |
| <b>Routine delivery care quality provided at best facility within 10 km</b> |                     |      |                                         |      |                                                      |            |        |                                                         |           |        |
| None                                                                        | 1722                | 15.3 | 479                                     | 27.8 | 0.28                                                 | 0.17-0.44  | <0.001 | 0.36                                                    | 0.23-0.56 | <0.001 |
| Substandard                                                                 | 125                 | 1.1  | 44                                      | 35.2 | 0.32                                                 | 0.12-0.87  | 0.026  | 0.38                                                    | 0.15-0.97 | 0.043  |
| Low                                                                         | 1917                | 17.0 | 1167                                    | 60.9 | 0.98                                                 | 0.61-1.58  | 0.94   | 1.14                                                    | 0.73-1.78 | 0.56   |
| Intermediate                                                                | 1923                | 17.1 | 1349                                    | 70.2 | 1                                                    |            |        | 1                                                       |           |        |
| High                                                                        | 2840                | 25.2 | 1640                                    | 57.8 | 0.71                                                 | 0.46-1.09  | 0.12   | 0.67                                                    | 0.45-1.00 | 0.048  |
| Highest                                                                     | 2747                | 24.4 | 1844                                    | 67.1 | 1.00                                                 | 0.65-1.54  | 0.99   | 0.80                                                    | 0.53-1.19 | 0.27   |

**Notes:**

<sup>1</sup> Chi square tests for % facility delivery across categories, both variables: p<0.001

<sup>2</sup> Wald test p-values for each level of categorical variables

<sup>3</sup> Covariates in adjusted models include: age, parity, previous stillbirth, multiple birth, marital status, wealth quintile, education, occupation, religion, ethnicity, health insurance and Newhints intervention zone.

**Supplementary table 6.** Association between facility delivery and distance to care and emergency care quality of the closest facility, using actual provision of signal functions in the previous six months.

|                                                                                 | Deliveries<br>n (%) | Facility delivery<br>n (%) <sup>2</sup> | Crude OR (95% CI), p-value <sup>3</sup><br>n= 11,274 | Adjusted <sup>4</sup> OR (95% CI), p-<br>value <sup>3</sup> n= 11,129 |
|---------------------------------------------------------------------------------|---------------------|-----------------------------------------|------------------------------------------------------|-----------------------------------------------------------------------|
| <b>Distance to closest delivery facility + EmOC quality of closest facility</b> |                     |                                         |                                                      |                                                                       |
| Sqrt distance <sup>1</sup>                                                      |                     |                                         | 0.47 (0.42-0.52), <0.001                             | 0.56 (0.50-0.63), <0.001                                              |
| CEmOC                                                                           | 577 (5.1)           | 329 (57.0)                              | 1.0                                                  | 1.0                                                                   |
| BEmOC                                                                           | 730 (6.5)           | 351 (48.1)                              | 0.64 (0.40-1.11), 0.12                               | 0.73 (0.42-1.27), 0.26                                                |
| Intermediate                                                                    | 239 (2.1)           | 182 (76.2)                              | 2.10 (0.99-4.46), 0.05                               | 1.76 (0.83-3.77), 0.14                                                |
| Low                                                                             | 4,702 (41.7)        | 2,873 (61.1)                            | 0.83 (0.56-1.25), 0.38                               | 0.97 (0.65-1.46), 0.89                                                |
| Substandard                                                                     | 5,026 (44.6)        | 2,788 (55.5)                            | 0.68 (0.46-1.02), 0.06                               | 0.79 (0.53-1.19), 0.26                                                |
| <b>Distance to closest delivery facility + EmNC quality of closest facility</b> |                     |                                         |                                                      |                                                                       |
| Sqrt distance <sup>1</sup>                                                      |                     |                                         | 0.46 (0.41-0.52), <0.001                             | 0.55 (0.49-0.62), <0.001                                              |
| CEmNC                                                                           | 0                   | 0                                       | 1.0                                                  | 1.0                                                                   |
| BEmNC                                                                           | 168 (1.5)           | 132 (78.6)                              | 1.0                                                  | 1.0                                                                   |
| Intermediate                                                                    | 2,816 (25.0)        | 1,605 (57.0)                            | 0.37 (0.13-1.02), 0.06                               | 0.67 (0.24-1.89), 0.45                                                |
| Low                                                                             | 3,646 (32.3)        | 2,147 (58.9)                            | 0.27 (0.099-0.76), 0.01                              | 0.58 (0.21-1.62), 0.30                                                |
| Substandard                                                                     | 4,644 (41.2)        | 2,639 (56.8)                            | 0.24 (0.90-0.68), 0.007                              | 0.55 (0.20-1.53), 0.04                                                |

**Notes:**

<sup>1</sup> Straight-line distance was square root transformed, e.g., 4km -->  $\sqrt{4} = 2$ , 9km -->  $\sqrt{9} = 3$ . ORs for facility delivery reflect the change per one unit of the transformed variable, i.e. from 1km to 4km to 9km, etc.

<sup>2</sup> Chi square tests for % facility delivery across categories, both variables:  $p < 0.001$

<sup>3</sup> Wald test p-values for each level of categorical variables

<sup>4</sup> Covariates in adjusted models include: age, parity, previous stillbirth, multiple birth, marital status, wealth quintile, education, occupation, religion, ethnicity, health insurance and Newhints intervention zone.



**Supplementary Figure 1.** Distances to closest delivery facility and to closest facility providing good quality routine care, emergency obstetric care and emergency newborn care for 11,274 rural deliveries.

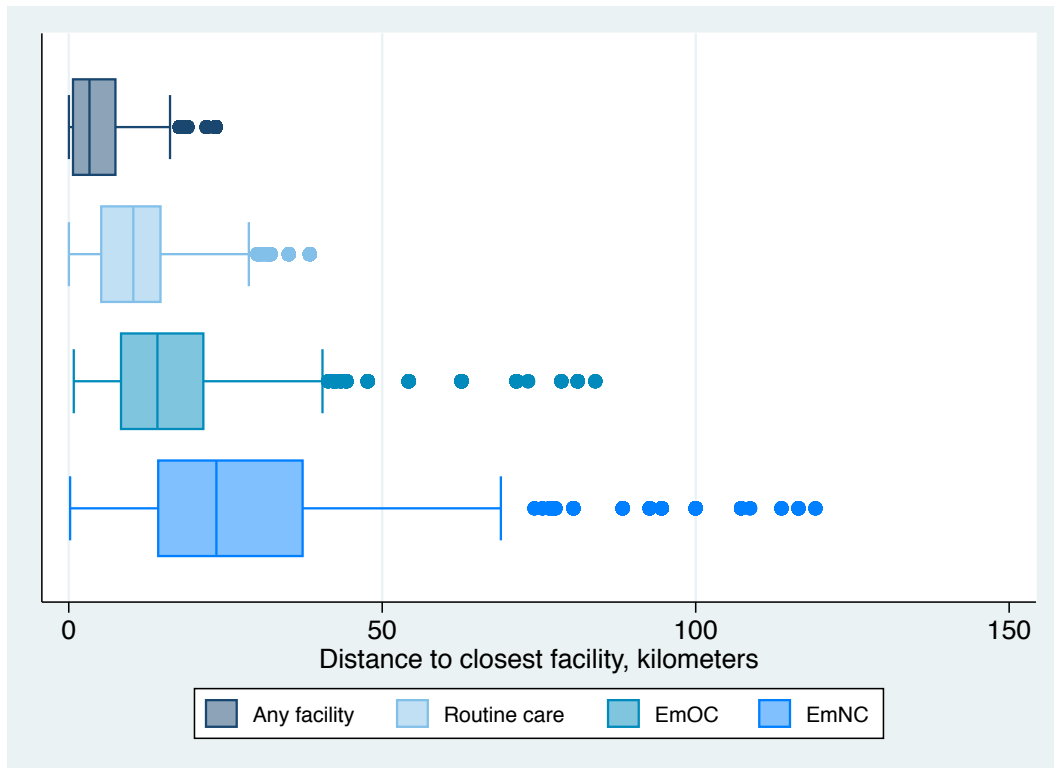

**REFERENCES:**

23. Lohela, T.J., et al., *Competence of health workers in emergency obstetric care: An assessment using clinical vignettes in Brong Ahafo region, Ghana.* Under Review BMJ Open, 2016.
